# Supplementary material
Source: PubMed Central journal article supplement (PMC7234897)
Supplement: NIHMS1541503-supplement-1.pdf [file NIHMS1541503-supplement-1.pdf]

Supplementary Table 1. Associations of prior day (lag 1) district-level PM<sub>2.5</sub> and ER visits for respiratory and circulatory diseases. Effect estimates presented as rate ratios (RR) and 95% confidence intervals (CI) per interquartile range (IQR) increase in PM<sub>2.5</sub>.\*

| Disease                    | Age Group | n       | RR           | LCL  | UCL  | p-value |
|----------------------------|-----------|---------|--------------|------|------|---------|
| Respiratory                | all       | 595,174 | 1.03         | 1.02 | 1.04 | <0.0001 |
|                            | <18       | 261,750 | 1.03         | 1.02 | 1.04 | <0.0001 |
|                            | 18-64     | 109,666 | 1.09         | 1.06 | 1.12 | <0.0001 |
|                            | 65+       | 35,620  | 0.99         | 0.95 | 1.03 | 0.7512  |
| Infectious Respiratory     | all       | 376,333 | 1.05         | 1.03 | 1.06 | <0.0001 |
|                            | <18       | 304,075 | 1.04         | 1.02 | 1.05 | <0.0001 |
|                            | 18-64     | 57,055  | 1.11         | 1.08 | 1.15 | <0.0001 |
|                            | 65+       | 15,203  | 1.02         | 0.97 | 1.08 | 0.3857  |
| Non-infectious respiratory | all       | 218,841 | 1.02         | 1.01 | 1.04 | 0.0031  |
|                            | <18       | 146,413 | 1.01         | 0.99 | 1.03 | 0.0708  |
|                            | 18-64     | 52,011  | 1.07         | 1.04 | 1.11 | <0.0001 |
|                            | 65+       | 20,417  | 0.98         | 0.93 | 1.03 | 0.3660  |
| Stroke                     | all       | 10,239  | 1.02         | 1.01 | 1.04 | 0.0031  |
|                            | <18       | 195     | Not converge |      |      |         |
|                            | 18-64     | 4,262   | 1.07         | 1.04 | 1.10 | <0.0001 |
|                            | 65+       | 5,872   | 0.97         | 0.93 | 1.03 | 0.3660  |
| Ischemic heart disease     | all       | 5,134   | 1.04         | 0.94 | 1.14 | 0.3973  |
|                            | <18       | 83      | Not converge |      |      |         |
|                            | 18-64     | 3,059   | 1.09         | 0.96 | 1.23 | 0.1446  |
|                            | 65+       | 1,992   | 0.96         | 0.82 | 1.13 | 0.6726  |

\*IQR for district level PM<sub>2.5</sub> was 6.1 ug/m<sup>3</sup>. Respiratory diseases (RD) J00 - J45, infectious respiratory disease (codes J00-J06, J09 - J22), non-infectious respiratory disease (codes J30-J45). Ischemic heart disease (I20 - I25), and stroke (G45, I63 - I67). Models adjusted for district, temps (quadratics and cubic terms), relative humidity (RH), day of week (DOW) and hospitals.

Supplementary Table 2. Associations of two-day prior (lag 2) district-level PM<sub>2.5</sub> and ER visits for respiratory and circulatory diseases. Effect estimates presented as rate ratios (RR) and 95% confidence intervals (CI) per interquartile range (IQR) increase in PM<sub>2.5</sub>.\*

| Disease                    | Age Group | n       | RR           | LCL  | UCL  | p-value |
|----------------------------|-----------|---------|--------------|------|------|---------|
| Respiratory                | all       | 595,174 | 1.03         | 1.02 | 1.04 | <0.0001 |
|                            | <18       | 261,750 | 1.02         | 1.01 | 1.03 | 0.0003  |
|                            | 18-64     | 109,666 | 1.07         | 1.04 | 1.09 | <0.0001 |
|                            | 65+       | 35,620  | 0.99         | 0.95 | 1.03 | 0.7268  |
| Infectious Respiratory     | all       | 376,333 | 1.03         | 1.02 | 1.04 | <0.0001 |
|                            | <18       | 304,075 | 1.02         | 1.01 | 1.04 | 0.0001  |
|                            | 18-64     | 57,055  | 1.09         | 1.05 | 1.12 | <0.0001 |
|                            | 65+       | 15,203  | 1.01         | 0.96 | 1.07 | 0.5676  |
| Non-infectious respiratory | all       | 218,841 | 1.02         | 1.00 | 1.03 | 0.0112  |
|                            | <18       | 146,413 | 1.02         | 0.99 | 1.03 | 0.0674  |
|                            | 18-64     | 52,011  | 1.05         | 1.02 | 1.09 | 0.0014  |
|                            | 65+       | 20,417  | 0.98         | 0.93 | 1.02 | 0.5390  |
| Stroke                     | all       | 10,239  | 1.02         | 0.95 | 1.09 | 0.6298  |
|                            | <18       | 195     | Not converge |      |      |         |
|                            | 18-64     | 4,262   | 1.00         | 0.90 | 1.11 | 0.9630  |
|                            | 65+       | 5,872   | 1.02         | 0.94 | 1.11 | 0.5878  |
| Ischemic heart disease     | all       | 5,134   | 1.04         | 0.94 | 1.14 | 0.4169  |
|                            | <18       | 83      | Not converge |      |      |         |
|                            | 18-64     | 3,059   |              | 0.95 | 1.22 | 0.2072  |
|                            | 65+       | 1,992   |              | 0.83 | 1.51 | 0.8119  |

\*IQR for district level PM<sub>2.5</sub> was 6.1 ug/m<sup>3</sup>. Respiratory diseases (RD) J00 - J45, infectious respiratory disease (codes J00-J06, J09 – J22), non-infectious respiratory disease (codes J30-J45). Models adjusted for district, temps (quadratics and cubic terms), relative humidity (RH), day of week (DOW) and hospitals.
